# Supplementary material for: Isopropoxy Benzene Guanidine Kills Staphylococcus aureus Without Detectable Resistance
Source: PubMed Central journal article supplement (PMC7890237; doi:10.3389/fmicb.2021.633467), 2021-02-04
Supplement: Data_Sheet_1.pdf [file Data_Sheet_1.pdf]

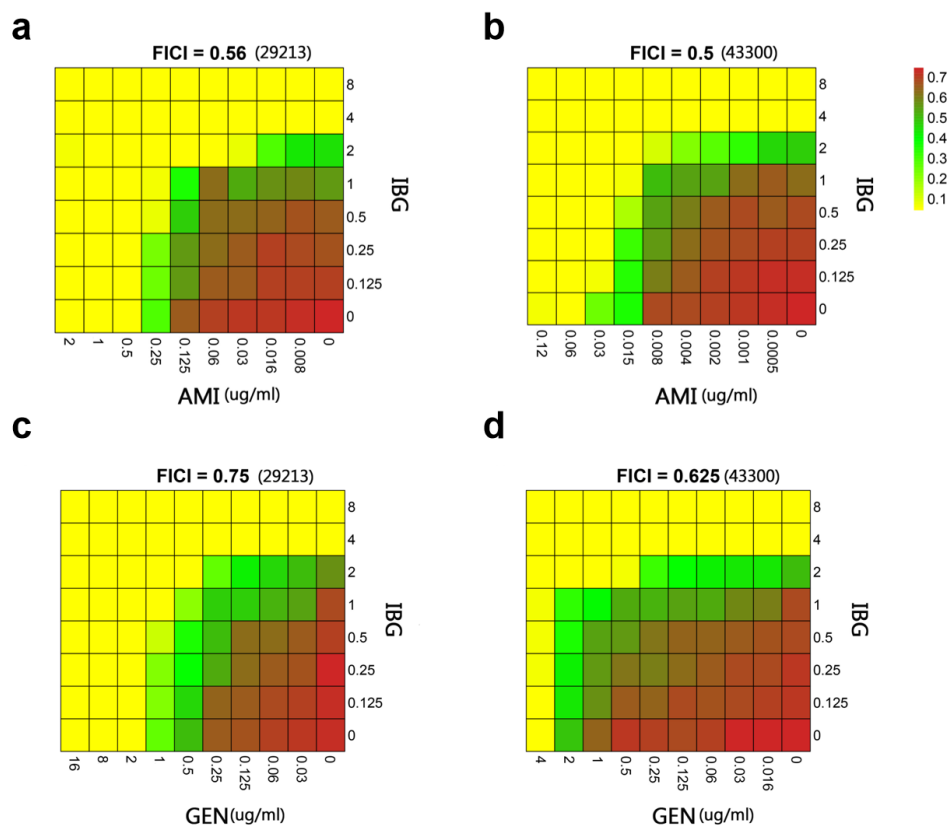

Fig S1 Potentiation of IBG partnered with amikacin, gentamicin against *S. aureus*.

a, The microdilution chequerboard assays of IBG and amikacin against *S. aureus* ATCC 29213. b, The microdilution chequerboard assays of IBG and amikacin against MRSA ATCC 43300. c, The microdilution chequerboard assays of IBG and gentamicin against *S. aureus* ATCC 29213. d, The microdilution chequerboard assays of IBG and gentamicin against MRSA ATCC 43300.

IBG, isopropoxy benzene guanidine; VAN, vancomycin; AMI, amikacin; GEN, gentamicin; The colour gradient represents the bacterial cell density estimated by OD<sub>600</sub> of biological replicates.

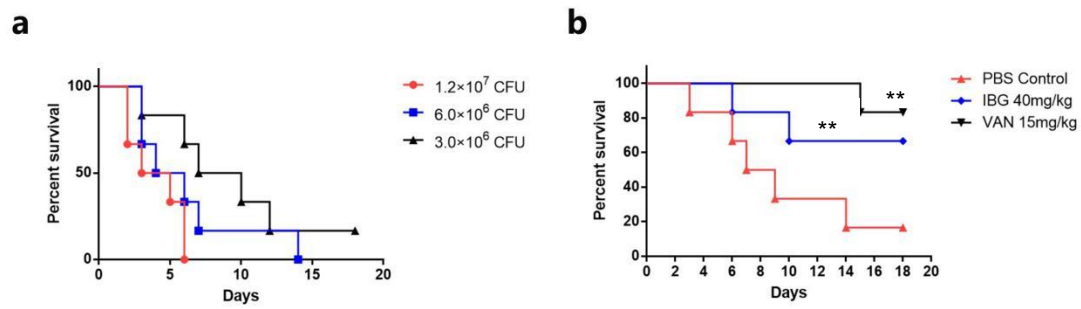

Fig S2 IBG is effective in a mouse model of MRSA septicemic infection

a, Different MRSA infection doses in mouse septicemic model b, Survival curves showing efficacy in a mouse septicemic infection model when treated with different drugs. A log rank test was performed using 95% confidence intervals and the statistical significance was calculated in order to compare treated to control groups. P values of ( $* \leq 0.05$ ) ( $**P \leq 0.01$ ) are considered as significant.

Supplementary Table S1: Activity of IBG against Gram-negative bacteria

| Organism and genotype                     | IBG MIC ( $\mu\text{g/ml}$ ) |
|-------------------------------------------|------------------------------|
| <i>Escherichia coli</i> ATCC25922         | >256                         |
| <i>Salmonella</i> ATCC14028               | >256                         |
| <i>Klebsiella pneumoniae</i> ATCC 4752    | >256                         |
| <i>Acinetobacter baumannii</i> ATCC 19606 | >256                         |
| <i>Pasteurella multocida</i> CVCC399      | >256                         |
| <i>Haemophilus parasuis</i> CVCC13R       | >256                         |
| <i>Serratia marcescens</i> CVCC52721      | >256                         |
| Clinical <i>Pseudomonas aeruginosa</i>    | >256                         |

Supplementary Table 2 Amino acid changes located in open reading frames after *in vitro* selection with IBG

| Strains | Day of passage | Mutation position | Mutation type    | Mutated gene      | Function                                        | Base change | Amino acid change |
|---------|----------------|-------------------|------------------|-------------------|-------------------------------------------------|-------------|-------------------|
| SP1     | 58             | 127787            | missense variant | <i>pnp_1</i>      | polyribonucleotide nucleotidyltransferase       | 247C>G      | Arg83Gly          |
| SP1     | 58             | 28077             | missense variant | <i>atpE</i>       | ATP synthase subunit c                          | 62A>T       | Asn21Ile          |
| SP1     | 58             | 31303             | missense variant | <i>walR</i>       | Transcriptional regulatory protein walR         | 319C>T      | Arg107Cys         |
| SP1     | 58             | 33408             | missense variant | <i>pcrA</i>       | ATP-dependent DNA helicase PcrA                 | 761A>G      | Asp254Gly         |
| SP1     | 58             | 34705             | missense variant | <i>ybiV</i>       | sugar phosphatase YbiV                          | 527C>T      | Ser176Leu         |
| SP1     | 58             | 43553             | missense variant | <i>Org1_01695</i> | hypothetical protein                            | 95C>A       | Pro32Gln          |
| SP1     | 58             | 61600             | missense variant | <i>Org1_01489</i> | hypothetical protein                            | 206G>C      | Gly69Ala          |
| SP1     | 58             | 76543             | missense variant | <i>Org1_01939</i> | putative universal stress protein               | 247G>A      | Val83Ile          |
| SP1     | 58             | 85845             | missense variant | <i>Org1_00143</i> | hypothetical protein                            | 42G>A       | Met14Ile          |
| SP1     | 99             | 1594              | stop gained      | <i>rsmG</i>       | ribosomal RNA small subunit methyltransferase G | 153T>G      | Tyr51*            |

| Strains | Day of passage | Mutation position | Mutation type      | Mutated gene      | Function                                   | Base change                      | Amino acid change |
|---------|----------------|-------------------|--------------------|-------------------|--------------------------------------------|----------------------------------|-------------------|
| SP1     | 99             | 28077             | missense variant   | <i>atpE</i>       | ATP synthase subunit c                     | 62A>T                            | Asn21Ile          |
| SP1     | 99             | 28879             | missense variant   | <i>dtd3</i>       | D-aminoacyl-tRNA deacylase                 | 469G>A                           | Gly157Ser         |
| SP1     | 99             | 31189             | missense variant   | <i>walR</i>       | transcriptional regulatory protein<br>walR | 205C>T                           | Arg69Cys          |
| SP1     | 99             | 33408             | missense variant   | <i>pcrA</i>       | ATP-dependent DNA helicase<br>PcrA         | 761A>G                           | Asp254Gly         |
| SP1     | 99             | 43795             | stop gained        | <i>Org1_01695</i> | hypothetical protein                       | 665G>A                           | Trp222*           |
| SP1     | 99             | 61414             | frameshift variant | <i>Org1_01489</i> | hypothetical protein                       | 22_41delTTTCGAAA<br>AGAAATTCTACA | Phe8fs            |
| SP1     | 99             | 65156             | missense variant   | <i>prkC</i>       | serine/threonine-protein kinase<br>PrkC    | 1610A>T                          | Lys537Ile         |
| SP1     | 99             | 82809             | missense variant   | <i>lip2</i>       | lipase 2                                   | 1219G>A                          | Val407Ile         |
| SP1     | 99             | 128200            | missense variant   | <i>mnhG1</i>      | Na(+)/H(+) antiporter subunit G1           | 74C>A                            | Ala25Asp          |

| Strains | Day of passage | Mutation position | Mutation type    | Mutated gene      | Function                                           | Base change | Amino acid change |
|---------|----------------|-------------------|------------------|-------------------|----------------------------------------------------|-------------|-------------------|
| SP2     | 58             | 8863              | missense variant | <i>rpoE</i>       | putative DNA-directed RNA polymerase subunit delta | 189C>A      | Asn63Lys          |
| SP2     | 58             | 28077             | missense variant | <i>atpE</i>       | ATP synthase subunit c                             | 62A>T       | Asn21Ile          |
| SP2     | 58             | 31303             | missense variant | <i>walR</i>       | transcriptional regulatory protein<br><i>walR</i>  | 319C>T      | Arg107Cys         |
| SP2     | 58             | 33408             | missense variant | <i>pcrA</i>       | ATP-dependent DNA helicase PcrA                    | 761A>G      | Asp254Gly         |
| SP2     | 58             | 34705             | missense variant | <i>ybiV</i>       | Sugar phosphatase YbiV                             | 527C>T      | Ser176Leu         |
| SP1     | 58             | 43553             | missense variant | <i>Org1_01695</i> | hypothetical protein                               | 95C>A       | Pro32Gln          |
| SP1     | 58             | 51219             | missense variant | <i>Org1_01701</i> | hypothetical protein                               | 29G>C       | Gly10Ala          |
| SP1     | 58             | 61600             | missense variant | <i>Org1_01489</i> | hypothetical protein                               | 206G>C      | Gly69Ala          |
| SP2     | 58             | 76543             | missense variant | <i>Org1_01939</i> | putative universal stress protein                  | 247G>A      | Val83Ile          |
| SP2     | 58             | 84845             | missense varian  | <i>Org1_00143</i> | hypothetical protein                               | 42G>A       | Met14Ile          |
| SP2     | 58             | 127787            | missense variant | <i>pnp_1</i>      | polyribonucleotide nucleotidyltransferase          | 247C>G      | Arg83Gly          |

| Strains | Day of passage | Mutation position | Mutation type      | Mutated gene      | Function                                                   | Base change | Amino acid change |
|---------|----------------|-------------------|--------------------|-------------------|------------------------------------------------------------|-------------|-------------------|
| SP2     | 100            | 20011             | frameshift variant | <i>nusG</i>       | transcription termination/<br>antitermination protein NusG | 193delA     | Thr65fs           |
| SP2     | 100            | 28077             | missense variant   | <i>atpE</i>       | ATP synthase subunit c                                     | 62A>T       | Asn21Ile          |
| SP2     | 100            | 33408             | missense variant   | <i>pcrA</i>       | ATP-dependent DNA helicase PcrA                            | 761A>G      | Asp254Gly         |
| SP2     | 100            | 33662             | missense variant   | <i>isdG_2</i>     | heme oxygenase<br>(staphylobilin-producing)                | 409T>C      | Tyr137His         |
| SP2     | 100            | 34665             | frameshift variant | <i>Org1_00312</i> | hypothetical protein                                       | 1150dupT    | Ser384fs          |
| SP2     | 100            | 433559            | missense variant   | <i>Org1_01695</i> | hypothetical protein                                       | 901G>T      | Val301Leu         |
| SP3     | 34             | 1594              | stop gained        | <i>rsmG</i>       | ribosomal RNA small subunit<br>methyltransferase G         | 153T>G      | Tyr51*            |
| SP3     | 34             | 28077             | missense variant   | <i>atpE</i>       | ATP synthase subunit c                                     | 62A>T       | Asn21Ile          |
| SP3     | 34             | 28879             | missense variant   | <i>dtd3</i>       | D-aminoacyl-tRNA deacylase                                 | 469G>A      | Gly157Ser         |

| Strains | Day of passage | Mutation position | Mutation type    | Mutated gene      | Function                                   | Base change | Amino acid change |
|---------|----------------|-------------------|------------------|-------------------|--------------------------------------------|-------------|-------------------|
| SP3     | 34             | 31189             | missense variant | <i>walR</i>       | Transcriptional regulatory protein<br>walR | 205C>T      | Arg69Cys          |
| SP3     | 34             | 33408             | missense variant | <i>pcrA</i>       | ATP-dependent DNA helicase PcrA            | 761A>G      | Asp254Gly         |
| SP3     | 34             | 61489             | missense variant | <i>Org1_01489</i> | hypothetical protein                       | 95C>A       | Pro32Gln          |
| SP3     | 34             | 82809             | missense variant | <i>lip2</i>       | lipase 2                                   | 1219G>A     | Val407Ile         |
| SP3     | 66             | 10208             | missense variant | <i>Org1_00874</i> | hypothetical protein                       | 82G>T       | Ala28Ser          |
| SP3     | 66             | 28077             | missense variant | <i>atpE</i>       | ATP synthase subunit c                     | 62A>T       | Asn21Ile          |
| SP3     | 66             | 28378             | missense variant | <i>Org1_00657</i> | hypothetical protein                       | 500C>T      | Thr167Ile         |
| SP3     | 66             | 31303             | missense variant | <i>walR</i>       | transcriptional regulatory protein<br>walR | 319C>T      | Arg107Cys         |
| SP3     | 66             | 33408             | missense variant | <i>pcrA</i>       | ATP-dependent DNA helicase PcrA            | 761A>G      | Asp254Gly         |
| SP3     | 66             | 34705             | missense variant | <i>ybiV</i>       | sugar phosphatase YbiV                     | 527C>T      | Ser176Leu         |

| Strains | Day of passage | Mutation position | Mutation type    | Mutated gene      | Function                                  | Base change | Amino acid change |
|---------|----------------|-------------------|------------------|-------------------|-------------------------------------------|-------------|-------------------|
| SP3     | 66             | 43553             | missense variant | <i>Org1_01695</i> | hypothetical protein                      | 95C>A       | Pro32Gln          |
| SP3     | 66             | 61600             | missense variant | <i>Org1_01489</i> | hypothetical protein                      | 206G>C      | Gly69Ala          |
| SP3     | 66             | 76543             | missense variant | <i>Org1_01939</i> | putative universal stress protein         | 247G>A      | Val83Ile          |
| SP3     | 66             | 84845             | missense varian  | <i>Org1_00143</i> | hypothetical protein                      | 42G>A       | Met14Ile          |
| SP3     | 66             | 127787            | missense variant | <i>pnp_1</i>      | polyribonucleotide nucleotidyltransferase | 247C>G      | Arg83Gly          |
| SP3     | 100            | 10208             | missense variant | <i>Org1_00874</i> | hypothetical protein                      | 82G>T       | Ala28Ser          |
| SP3     | 100            | 28077             | missense variant | <i>atpE</i>       | ATP synthase subunit c                    | 62A>T       | Asn21Ile          |
| SP3     | 100            | 28378             | missense variant | <i>Org1_00657</i> | hypothetical protein                      | 500C>T      | Thr167Ile         |
| SP3     | 100            | 31303             | missense variant | <i>walR</i>       | transcriptional regulatory protein walR   | 319C>T      | Arg107Cys         |
| SP3     | 100            | 33408             | missense variant | <i>pcrA</i>       | ATP-dependent DNA helicase <i>PcrA</i>    | 761A>G      | Asp254Gly         |



| Strains | Day of passage | Mutation position | Mutation type                            | Mutated gene      | Function                                          | Base change                                           | Amino acid change      |
|---------|----------------|-------------------|------------------------------------------|-------------------|---------------------------------------------------|-------------------------------------------------------|------------------------|
| SP3     | 100            | 34705             | missense variant                         | <i>ybiV</i>       | sugar phosphatase YbiV                            | 527C>T                                                | Ser176Leu              |
| SP3     | 100            | 43553             | missense variant                         | <i>Org1_01695</i> | hypothetical protein                              | 95C>A                                                 | Pro32Gln               |
| SP3     | 100            | 52557             | frameshift variant                       | <i>sasA</i>       | Adaptive-response sensory-kinase<br>SasA          | 1277delA                                              | Asn426fs               |
| SP3     | 100            | 76543             | missense variant                         | <i>Org1_01939</i> | putative universal stress protein                 | 247G>A                                                | Val83Ile               |
| SP3     | 100            | 84845             | missense variant                         | <i>Org1_00143</i> | hypothetical protein                              | 42G>A                                                 | Met14Ile               |
| SP3     | 100            | 93138             | missense variant                         | <i>tcaR</i>       | HTH-type transcriptional regulator<br><i>TcaR</i> | 200C>T                                                | Ala67Val               |
| SP3     | 100            | 127787            | missense variant                         | <i>pnp_1</i>      | polyribonucleotide nucleotidyltransferase         | 247C>G                                                | Arg83Gly               |
| SP3     | 100            | 159526            | stop gained, disruptive inframe deletion | <i>glpK</i>       | glycerol kinase                                   | 792_863delTGGA<br>ACTGGTGGCTTCATGTT<br>AATGAATACAGGT- | Tyr264_Thr288delinsTer |

IBG, isopropoxy benzene guanidine; SP1, SP2 and SP3 indicate three independent *S. aureus* 29213 cultures
